# Supplementary material
Source: HighWire-hosted journal article supplement (https://bibliotheek.ehb.be:2666/highwire/filestream/164803/field_highwire_adjunct_files/7/bmjqs-2024-017434supp008_data_supplement.pdf)
Supplement: bmjqs-2024-017434supp008_data_supplement.pdf [file bmjqs-2024-017434supp008_data_supplement.pdf]

**Appendix 8: Item characteristics per medical condition - inpatient sample**

**Article:** Through the patients' eyes - Psychometric evaluation of the Experienced Patient-Centeredness Questionnaire (EPAT-64)

**Abbreviations:**

- Card = Cardiovascular diseases
- Mus = Musloskeletal diseases
- Ment = Mental disorders

Dimension „Essential characteristics of the clinicians”

|        |                                                                                                                                                                                     | mean |      |        |     |      | standard deviation |      |        |     |      |
|--------|-------------------------------------------------------------------------------------------------------------------------------------------------------------------------------------|------|------|--------|-----|------|--------------------|------|--------|-----|------|
| Item   |                                                                                                                                                                                     | All  | Card | Cancer | Mus | Ment | All                | Card | Cancer | Mus | Ment |
| Item 1 | The healthcare professionals were sensitive (for example they addressed my feelings, showed understanding, or empathized with my situation).                                        | 5.1  | 5.1  | 5.5    | 4.6 | 5.5  | 1.2                | 1.2  | 0.8    | 1.3 | 0.8  |
| Item 2 | The healthcare professionals behaved respectfully and appreciatively.                                                                                                               | 5.5  | 5.6  | 5.8    | 5.2 | 5.8  | 0.9                | 0.9  | 0.6    | 1.1 | 0.6  |
| Item 3 | The healthcare professionals were committed to finding a solution for my health concerns.                                                                                           | 5.3  | 5.4  | 5.6    | 4.9 | 5.6  | 1.0                | 1.0  | 0.7    | 1.1 | 0.7  |
| Item 4 | If I wanted to, difficult topics were discussed directly and openly by the healthcare professionals (for example, long-term effects of the illness, life expectancy, or sexuality). | 4.7  | 4.7  | 5.1    | 4.0 | 5.1  | 1.5                | 1.5  | 1.3    | 1.7 | 1.3  |

| item difficulty |      |      |        |      | 'does not concern me' |       |       |        |       | no reply |      |      |        |      | item total correlation |      |      |        |      |      |
|-----------------|------|------|--------|------|-----------------------|-------|-------|--------|-------|----------|------|------|--------|------|------------------------|------|------|--------|------|------|
|                 | All  | Card | Cancer | Mus  | Ment                  | All   | Card  | Cancer | Mus   | Ment     | All  | Card | Cancer | Mus  | Ment                   | All  | Card | Cancer | Mus  | Ment |
| Item 1          | 81.9 | 82.5 | 89.0   | 71.6 | 89.0                  | 3.9%  | 7.7%  | 2.3%   | 5.4%  | 2.3%     | 0.8% | 0.7% | 0.9%   | 1.1% | 0.9%                   | 0.73 | 0.61 | 0.67   | 0.76 | 0.67 |
| Item 2          | 89.5 | 91.3 | 95.1   | 84.9 | 95.1                  | 0.2%  | 0.0%  | 0.0%   | 1.1%  | 0.0%     | 0.9% | 0.7% | 1.2%   | 1.1% | 1.2%                   | 0.75 | 0.74 | 0.67   | 0.74 | 0.67 |
| Item 3          | 85.0 | 88.1 | 91.3   | 78.7 | 91.3                  | 2.9%  | 4.9%  | 2.1%   | 1.1%  | 2.1%     | 1.1% | 1.0% | 1.5%   | 0.0% | 1.5%                   | 0.74 | 0.67 | 0.70   | 0.64 | 0.70 |
| Item 4          | 74.7 | 73.4 | 82.4   | 60.3 | 82.4                  | 30.3% | 39.5% | 27.3%  | 33.7% | 27.3%    | 1.0% | 1.4% | 1.2%   | 0.0% | 1.2%                   | 0.65 | 0.51 | 0.64   | 0.70 | 0.64 |

Dimension „Clinician-patient relationship”

| Item                                                                                                                                     | mean |      |        |     |      | standard deviation |      |        |     |      |
|------------------------------------------------------------------------------------------------------------------------------------------|------|------|--------|-----|------|--------------------|------|--------|-----|------|
|                                                                                                                                          | All  | Card | Cancer | Mus | Ment | All                | Card | Cancer | Mus | Ment |
| Item 1 I trusted my healthcare professionals.                                                                                            | 5.3  | 5.4  | 5.6    | 4.9 | 5.6  | 1.1                | 1.0  | 0.8    | 1.3 | 0.8  |
| Item 2 I felt I could confide in my healthcare professionals (for example, on intimate or difficult topics).                             | 4.9  | 4.8  | 5.2    | 4.4 | 5.2  | 1.3                | 1.4  | 1.1    | 1.7 | 1.1  |
| Item 3 I was able to talk to the healthcare professionals in a confidential setting (for example, in private, without anyone listening). | 4.8  | 4.4  | 4.8    | 4.5 | 4.8  | 1.6                | 1.7  | 1.6    | 1.6 | 1.6  |
| Item 4 The healthcare professionals knew about my medical history and my current health status.                                          | 5.2  | 5.3  | 5.4    | 5.0 | 5.4  | 1.0                | 1.0  | 0.8    | 1.1 | 0.8  |

|        | item difficulty |      |        |      |      | 'does not concern me' |       |        |       |       | no reply |      |        |      |      | item total correlation |      |        |      |      |
|--------|-----------------|------|--------|------|------|-----------------------|-------|--------|-------|-------|----------|------|--------|------|------|------------------------|------|--------|------|------|
|        | All             | Card | Cancer | Mus  | Ment | All                   | Card  | Cancer | Mus   | Ment  | All      | Card | Cancer | Mus  | Ment | All                    | Card | Cancer | Mus  | Ment |
| Item 1 | 86.3            | 88.6 | 91.2   | 78.7 | 91.2 | 1.2%                  | 2.4%  | 0.3%   | 2.2%  | 0.3%  | 0.4%     | 1.0% | 0.3%   | 0.0% | 0.3% | 0.71                   | 0.66 | 0.68   | 0.81 | 0.68 |
| Item 2 | 78.6            | 76.8 | 84.1   | 68.3 | 84.1 | 12.9%                 | 24.8% | 8.8%   | 17.4% | 8.8%  | 0.8%     | 1.7% | 0.3%   | 1.1% | 0.3% | 0.75                   | 0.72 | 0.70   | 0.78 | 0.70 |
| Item 3 | 75.4            | 67.2 | 75.6   | 69.9 | 75.6 | 12.6%                 | 23.4% | 12.3%  | 3.3%  | 12.3% | 0.6%     | 1.0% | 0.3%   | 2.2% | 0.3% | 0.52                   | 0.58 | 0.59   | 0.55 | 0.59 |
| Item 4 | 84.4            | 85.6 | 88.5   | 79.2 | 88.5 | 1.3%                  | 1.7%  | 1.2%   | 1.1%  | 1.2%  | 0.5%     | 1.4% | 0.3%   | 0.0% | 0.3% | 0.61                   | 0.66 | 0.55   | 0.58 | 0.55 |

Dimension „Patient as a unique person”

|        |                                                                                                        | mean |      |        |     |      | standard deviation |      |        |     |      |
|--------|--------------------------------------------------------------------------------------------------------|------|------|--------|-----|------|--------------------|------|--------|-----|------|
| Item   |                                                                                                        | All  | Card | Cancer | Mus | Ment | All                | Card | Cancer | Mus | Ment |
| Item 1 | My wishes, needs and expectations were asked and taken into account in the treatment.                  | 4.8  | 4.8  | 5.1    | 4.3 | 5.1  | 1.3                | 1.4  | 1.2    | 1.6 | 1.2  |
| Item 2 | My healthcare professionals addressed me personally and did not treat me as just one of many patients. | 5.1  | 5.2  | 5.4    | 4.5 | 5.4  | 1.2                | 1.1  | 0.9    | 1.5 | 0.9  |
| Item 3 | My personal health goals were asked and taken into account.                                            | 4.1  | 3.7  | 4.2    | 3.8 | 4.2  | 1.7                | 1.8  | 1.7    | 1.7 | 1.7  |
| Item 4 | It was asked and taken into account what opportunities and skills I can provide to support my health.  | 3.7  | 3.3  | 3.6    | 3.4 | 3.6  | 1.7                | 1.8  | 1.7    | 1.9 | 1.7  |

|        |  | item difficulty |      |        |      |      | 'does not concern me' |       |        |      |       | no reply |      |        |      |      | item total correlation |      |        |      |      |
|--------|--|-----------------|------|--------|------|------|-----------------------|-------|--------|------|-------|----------|------|--------|------|------|------------------------|------|--------|------|------|
|        |  | All             | Card | Cancer | Mus  | Ment | All                   | Card  | Cancer | Mus  | Ment  | All      | Card | Cancer | Mus  | Ment | All                    | Card | Cancer | Mus  | Ment |
| Item 1 |  | 75.8            | 76.9 | 81.5   | 65.2 | 81.5 | 5.5%                  | 9.4%  | 5.9%   | 3.3% | 5.9%  | 0.9%     | 1.0% | 0.6%   | 0.0% | 0.6% | 0.73                   | 0.60 | 0.74   | 0.86 | 0.74 |
| Item 2 |  | 82.0            | 83.9 | 88.4   | 70.2 | 88.4 | 1.6%                  | 2.8%  | 1.8%   | 0.0% | 1.8%  | 0.6%     | 0.7% | 0.3%   | 0.0% | 0.3% | 0.58                   | 0.49 | 0.55   | 0.75 | 0.55 |
| Item 3 |  | 62.2            | 54.1 | 64.1   | 56.8 | 64.1 | 12.8%                 | 17.8% | 16.4%  | 4.3% | 16.4% | 0.9%     | 1.0% | 0.6%   | 0.0% | 0.6% | 0.72                   | 0.68 | 0.76   | 0.77 | 0.76 |
| Item 4 |  | 53.9            | 47.0 | 52.9   | 47.8 | 52.9 | 14.5%                 | 22.0% | 16.7%  | 6.5% | 16.7% | 0.9%     | 0.7% | 0.3%   | 1.1% | 0.3% | 0.63                   | 0.62 | 0.65   | 0.69 | 0.65 |

Dimension „Biopsychosocial perspective”

|        |                                                                                                                                                                                               | mean |      |        |     |      | standard deviation |      |        |     |      |
|--------|-----------------------------------------------------------------------------------------------------------------------------------------------------------------------------------------------|------|------|--------|-----|------|--------------------|------|--------|-----|------|
| Item   |                                                                                                                                                                                               | All  | Card | Cancer | Mus | Ment | All                | Card | Cancer | Mus | Ment |
| Item 1 | My entire personal life was taken into account during the treatment (for example, job, family and friends, partnership and sexuality, culture and religion, age, or financial circumstances). | 3.8  | 3.3  | 3.8    | 3.5 | 3.8  | 1.8                | 1.7  | 1.8    | 1.9 | 1.8  |
| Item 2 | I was asked how my condition affects my life.                                                                                                                                                 | 3.8  | 3.5  | 3.6    | 3.9 | 3.6  | 1.9                | 1.9  | 1.9    | 1.9 | 1.9  |
| Item 3 | My entire medical history was asked and taken into account.                                                                                                                                   | 4.9  | 4.9  | 5.0    | 4.8 | 5.0  | 1.4                | 1.4  | 1.3    | 1.4 | 1.3  |
| Item 4 | I was informed about the interaction of physical, psychological, and social factors.                                                                                                          | 3.4  | 2.9  | 3.5    | 3.0 | 3.5  | 1.8                | 1.8  | 1.8    | 1.9 | 1.8  |

|        | item difficulty |      |        |      |      | 'does not concern me' |       |        |      |       | no reply |      |        |      |      | item total correlation |      |        |      |      |
|--------|-----------------|------|--------|------|------|-----------------------|-------|--------|------|-------|----------|------|--------|------|------|------------------------|------|--------|------|------|
|        | All             | Card | Cancer | Mus  | Ment | All                   | Card  | Cancer | Mus  | Ment  | All      | Card | Cancer | Mus  | Ment | All                    | Card | Cancer | Mus  | Ment |
| Item 1 | 55.8            | 45.8 | 55.3   | 49.1 | 55.3 | 14.2%                 | 24.1% | 15.8%  | 4.3% | 15.8% | 0.8%     | 0.3% | 0.9%   | 2.2% | 0.9% | 0.78                   | 0.77 | 0.80   | 0.77 | 0.80 |
| Item 2 | 57.0            | 49.5 | 52.3   | 58.2 | 52.3 | 10.2%                 | 14.7% | 12.6%  | 4.3% | 12.6% | 1.0%     | 1.0% | 1.5%   | 0.0% | 1.5% | 0.71                   | 0.70 | 0.73   | 0.74 | 0.73 |
| Item 3 | 78.2            | 78.2 | 80.5   | 76.2 | 80.5 | 4.9%                  | 6.3%  | 6.2%   | 2.2% | 6.2%  | 0.6%     | 0.3% | 0.9%   | 1.1% | 0.9% | 0.53                   | 0.52 | 0.52   | 0.63 | 0.52 |
| Item 4 | 48.5            | 38.0 | 49.1   | 40.5 | 49.1 | 13.0%                 | 19.6% | 14.4%  | 8.7% | 14.4% | 0.9%     | 0.7% | 0.9%   | 1.1% | 0.9% | 0.72                   | 0.69 | 0.74   | 0.79 | 0.74 |

Dimension „Clinician-patient communication”

|        |                                                                                                                      | mean |      |        |     |      | standard deviation |      |        |     |      |
|--------|----------------------------------------------------------------------------------------------------------------------|------|------|--------|-----|------|--------------------|------|--------|-----|------|
| Item   |                                                                                                                      | All  | Card | Cancer | Mus | Ment | All                | Card | Cancer | Mus | Ment |
| Item 1 | I was given enough time to describe my concerns and my situation (for example, medical history or current symptoms). | 5.2  | 5.3  | 5.5    | 4.8 | 5.5  | 1.1                | 1.0  | 0.9    | 1.3 | 0.9  |
| Item 2 | The healthcare professionals used terms that were easy to understand.                                                | 5.2  | 5.1  | 5.3    | 4.9 | 5.3  | 1.1                | 1.1  | 0.9    | 1.4 | 0.9  |
| Item 3 | The healthcare professionals looked at me and listened carefully during our conversation.                            | 5.5  | 5.5  | 5.7    | 5.1 | 5.7  | 0.9                | 0.8  | 0.7    | 1.2 | 0.7  |
| Item 4 | The healthcare professionals ensured that I understood correctly what was explained to me.                           | 5.0  | 5.2  | 5.2    | 4.5 | 5.2  | 1.2                | 1.2  | 1.0    | 1.5 | 1.0  |

|        |  | item difficulty |      |        |      |      | 'does not concern me' |      |        |      |      | no reply |      |        |      |      | item total correlation |      |        |      |      |
|--------|--|-----------------|------|--------|------|------|-----------------------|------|--------|------|------|----------|------|--------|------|------|------------------------|------|--------|------|------|
|        |  | All             | Card | Cancer | Mus  | Ment | All                   | Card | Cancer | Mus  | Ment | All      | Card | Cancer | Mus  | Ment | All                    | Card | Cancer | Mus  | Ment |
| Item 1 |  | 85.0            | 87.0 | 89.9   | 76.5 | 89.9 | 2.8%                  | 2.1% | 5.3%   | 0.0% | 5.3% | 0.5%     | 0.3% | 0.9%   | 0.0% | 0.9% | 0.72                   | 0.71 | 0.69   | 0.81 | 0.69 |
| Item 2 |  | 83.7            | 81.9 | 86.8   | 78.0 | 86.8 | 0.5%                  | 0.7% | 0.6%   | 0.0% | 0.6% | 0.5%     | 0.3% | 0.9%   | 0.0% | 0.9% | 0.67                   | 0.73 | 0.63   | 0.70 | 0.63 |
| Item 3 |  | 89.6            | 90.7 | 93.2   | 81.5 | 93.2 | 0.2%                  | 0.3% | 0.3%   | 0.0% | 0.3% | 0.4%     | 0.3% | 0.9%   | 0.0% | 0.9% | 0.74                   | 0.80 | 0.68   | 0.68 | 0.68 |
| Item 4 |  | 80.2            | 83.3 | 84.7   | 70.4 | 84.7 | 2.3%                  | 3.1% | 2.1%   | 0.0% | 2.1% | 0.9%     | 0.7% | 1.8%   | 0.0% | 1.8% | 0.71                   | 0.72 | 0.72   | 0.67 | 0.72 |

Dimension „Integration of medical and non-medical care“

|        |                                                                                                                                                                                                      | mean |      |        |     |      | standard deviation |      |        |     |      |
|--------|------------------------------------------------------------------------------------------------------------------------------------------------------------------------------------------------------|------|------|--------|-----|------|--------------------|------|--------|-----|------|
| Item   |                                                                                                                                                                                                      | All  | Card | Cancer | Mus | Ment | All                | Card | Cancer | Mus | Ment |
| Item 1 | I was asked if I use or would like to use additional services (for example, support groups, counseling, health courses, complementary and alternative medicine, or spiritual support/pastoral care). | 3.4  | 2.5  | 3.8    | 2.8 | 3.8  | 2.0                | 1.8  | 2.0    | 1.8 | 2.0  |
| Item 2 | If I used or wanted to use additional services, it was accepted.                                                                                                                                     | 4.3  | 3.2  | 4.7    | 3.8 | 4.7  | 1.8                | 1.9  | 1.7    | 2.0 | 1.7  |
| Item 3 | The healthcare professionals informed me about the advantages and disadvantages of additional services.                                                                                              | 3.3  | 2.9  | 3.6    | 2.7 | 3.6  | 1.9                | 1.9  | 2.0    | 2.0 | 2.0  |
| Item 4 | If necessary, I was given specific contacts where I could get information about additional offers.                                                                                                   | 3.6  | 2.8  | 4.0    | 3.0 | 4.0  | 2.0                | 1.9  | 2.0    | 2.1 | 2.0  |

|        | item difficulty |      |        |      |      | 'does not concern me' |       |        |       |       | no reply |      |        |      |      | item total correlation |      |        |      |      |
|--------|-----------------|------|--------|------|------|-----------------------|-------|--------|-------|-------|----------|------|--------|------|------|------------------------|------|--------|------|------|
|        | All             | Card | Cancer | Mus  | Ment | All                   | Card  | Cancer | Mus   | Ment  | All      | Card | Cancer | Mus  | Ment | All                    | Card | Cancer | Mus  | Ment |
| Item 1 | 48.7            | 30.0 | 56.8   | 35.5 | 56.8 | 25.8%                 | 43.7% | 21.4%  | 21.7% | 21.4% | 1.5%     | 1.0% | 2.3%   | 1.1% | 2.3% | 0.81                   | 0.85 | 0.82   | 0.86 | 0.82 |
| Item 2 | 65.8            | 43.3 | 74.8   | 55.1 | 74.8 | 56.7%                 | 68.9% | 63.9%  | 51.1% | 63.9% | 2.6%     | 3.8% | 3.2%   | 0.0% | 3.2% | 0.85                   | 0.95 | 0.87   | 0.80 | 0.87 |
| Item 3 | 46.1            | 38.3 | 51.5   | 34.8 | 51.5 | 40.9%                 | 51.0% | 44.6%  | 33.7% | 44.6% | 2.4%     | 2.8% | 3.5%   | 0.0% | 3.5% | 0.81                   | 0.88 | 0.83   | 0.85 | 0.83 |
| Item 4 | 52.4            | 35.8 | 59.4   | 39.6 | 59.4 | 42.3%                 | 53.1% | 47.8%  | 40.2% | 47.8% | 2.7%     | 3.8% | 3.2%   | 0.0% | 3.2% | 0.84                   | 0.90 | 0.88   | 0.83 | 0.88 |

Dimension „Teamwork and teambuilding”

|        |                                                                                                                             | mean |      |        |     |      | standard deviation |      |        |     |      |
|--------|-----------------------------------------------------------------------------------------------------------------------------|------|------|--------|-----|------|--------------------|------|--------|-----|------|
| Item   |                                                                                                                             | All  | Card | Cancer | Mus | Ment | All                | Card | Cancer | Mus | Ment |
| Item 1 | The processes within the team were well organized.                                                                          | 5.1  | 5.2  | 5.4    | 4.9 | 5.4  | 1.1                | 1.1  | 0.9    | 1.2 | 0.9  |
| Item 2 | The entire care team was responsible and approachable for me.                                                               | 5.1  | 5.2  | 5.4    | 4.8 | 5.4  | 1.2                | 1.1  | 0.8    | 1.3 | 0.8  |
| Item 3 | The care team exchanged information about my current health status (for example, everyone was informed about test results). | 5.0  | 5.1  | 5.3    | 4.6 | 5.3  | 1.2                | 1.1  | 0.9    | 1.5 | 0.9  |
| Item 4 | Various healthcare professionals within the care team have given me contradictory information.                              | 4.8  | 5.0  | 5.2    | 4.2 | 5.2  | 1.6                | 1.5  | 1.3    | 1.7 | 1.3  |

|        |  | item difficulty |      |        |      |      | 'does not concern me' |       |        |      |      | no reply |      |        |      |      | item total correlation |      |        |      |      |
|--------|--|-----------------|------|--------|------|------|-----------------------|-------|--------|------|------|----------|------|--------|------|------|------------------------|------|--------|------|------|
|        |  | All             | Card | Cancer | Mus  | Ment | All                   | Card  | Cancer | Mus  | Ment | All      | Card | Cancer | Mus  | Ment | All                    | Card | Cancer | Mus  | Ment |
| Item 1 |  | 81.8            | 83.9 | 88.6   | 78.0 | 88.6 | 1.2%                  | 1.4%  | 0.3%   | 3.3% | 0.3% | 1.0%     | 1.4% | 0.6%   | 1.1% | 0.6% | 0.72                   | 0.72 | 0.66   | 0.74 | 0.66 |
| Item 2 |  | 82.2            | 84.4 | 89.0   | 75.3 | 89.0 | 1.4%                  | 2.1%  | 0.6%   | 2.2% | 0.6% | 1.2%     | 2.1% | 0.6%   | 1.1% | 0.6% | 0.71                   | 0.66 | 0.66   | 0.63 | 0.66 |
| Item 3 |  | 80.5            | 82.3 | 86.9   | 72.0 | 86.9 | 3.0%                  | 4.5%  | 2.3%   | 3.3% | 2.3% | 1.6%     | 2.1% | 1.8%   | 2.2% | 1.8% | 0.70                   | 0.67 | 0.68   | 0.72 | 0.68 |
| Item 4 |  | 75.3            | 79.0 | 83.6   | 63.1 | 83.6 | 7.5%                  | 10.1% | 7.3%   | 7.6% | 7.3% | 1.2%     | 1.4% | 1.5%   | 1.1% | 1.5% | 0.41                   | 0.35 | 0.39   | 0.28 | 0.39 |



Dimension „Access to care”

| Item                                                                                                                   | mean |      |        |     |      | standard deviation |      |        |     |      |
|------------------------------------------------------------------------------------------------------------------------|------|------|--------|-----|------|--------------------|------|--------|-----|------|
|                                                                                                                        | All  | Card | Cancer | Mus | Ment | All                | Card | Cancer | Mus | Ment |
| Item 1 If I wanted to speak to a physician, they were easily accessible.                                               | 4.8  | 4.9  | 5.2    | 4.5 | 5.2  | 1.2                | 1.2  | 1.0    | 1.4 | 1.0  |
| Item 2 If my inpatient stay was scheduled, I received an appointment in time.                                          | 5.4  | 5.6  | 5.7    | 5.3 | 5.7  | 1.1                | 0.9  | 0.8    | 1.2 | 0.8  |
| Item 3 If my inpatient stay was scheduled, I could easily get an appointment (for example via phone, mail, or website) | 5.2  | 5.3  | 5.5    | 5.1 | 5.5  | 1.3                | 1.2  | 1.0    | 1.3 | 1.0  |
| Item 4 If I rang the bell for the nurse, I was helped quickly.                                                         | 5.5  | 5.5  | 5.7    | 5.3 | 5.7  | 0.9                | 0.9  | 0.6    | 1.0 | 0.6  |

|        | item difficulty |      |        |      |      | 'does not concern me' |       |        |       |       | no reply |      |        |      |      | item total correlation |      |        |      |      |
|--------|-----------------|------|--------|------|------|-----------------------|-------|--------|-------|-------|----------|------|--------|------|------|------------------------|------|--------|------|------|
|        | All             | Card | Cancer | Mus  | Ment | All                   | Card  | Cancer | Mus   | Ment  | All      | Card | Cancer | Mus  | Ment | All                    | Card | Cancer | Mus  | Ment |
| Item 1 | 76.2            | 78.0 | 83.5   | 69.5 | 83.5 | 6.6%                  | 9.8%  | 5.6%   | 6.5%  | 5.6%  | 1.0%     | 1.0% | 1.5%   | 0.0% | 1.5% | 0.54                   | 0.55 | 0.54   | 0.39 | 0.54 |
| Item 2 | 88.4            | 91.9 | 93.2   | 85.9 | 93.2 | 18.2%                 | 22.4% | 13.2%  | 19.6% | 13.2% | 0.9%     | 1.4% | 1.2%   | 0.0% | 1.2% | 0.61                   | 0.46 | 0.63   | 0.43 | 0.63 |
| Item 3 | 83.3            | 86.1 | 89.5   | 82.4 | 89.5 | 30.4%                 | 43.4% | 22.9%  | 26.1% | 22.9% | 1.9%     | 3.5% | 2.1%   | 0.0% | 2.1% | 0.64                   | 0.44 | 0.69   | 0.50 | 0.69 |
| Item 4 | 89.0            | 89.7 | 93.3   | 86.0 | 93.3 | 20.0%                 | 9.8%  | 10.9%  | 31.5% | 10.9% | 1.0%     | 1.4% | 1.2%   | 0.0% | 1.2% | 0.54                   | 0.56 | 0.41   | 0.46 | 0.41 |

Dimension „Coordination and continuity of care”

|        |                                                                                                                                                                              | mean |      |        |     |      | standard deviation |      |        |     |      |
|--------|------------------------------------------------------------------------------------------------------------------------------------------------------------------------------|------|------|--------|-----|------|--------------------|------|--------|-----|------|
| Item   |                                                                                                                                                                              | All  | Card | Cancer | Mus | Ment | All                | Card | Cancer | Mus | Ment |
| Item 1 | It was discussed with me whether follow-up appointments would be useful (for example, for aftercare or further treatment).                                                   | 5.0  | 5.0  | 5.3    | 4.8 | 5.3  | 1.4                | 1.4  | 1.2    | 1.5 | 1.2  |
| Item 2 | I was explained how long I will approximately have to wait and why.                                                                                                          | 4.2  | 4.1  | 4.6    | 4.0 | 4.6  | 1.6                | 1.7  | 1.5    | 1.8 | 1.5  |
| Item 3 | The healthcare professionals took enough time for me.                                                                                                                        | 5.1  | 5.2  | 5.4    | 4.9 | 5.4  | 1.1                | 1.1  | 0.9    | 1.1 | 0.9  |
| Item 4 | If required, my follow-up appointments were arranged or it was explained how I could arrange follow-up appointments myself (for example for aftercare or further treatment). | 4.8  | 4.8  | 5.3    | 4.4 | 5.3  | 1.4                | 1.5  | 1.1    | 1.6 | 1.1  |

|        |  | item difficulty |      |        |      |      | 'does not concern me' |      |        |       |      | no reply |      |        |      |      | item total correlation |      |        |      |      |
|--------|--|-----------------|------|--------|------|------|-----------------------|------|--------|-------|------|----------|------|--------|------|------|------------------------|------|--------|------|------|
|        |  | All             | Card | Cancer | Mus  | Ment | All                   | Card | Cancer | Mus   | Ment | All      | Card | Cancer | Mus  | Ment | All                    | Card | Cancer | Mus  | Ment |
| Item 1 |  | 80.0            | 79.9 | 86.3   | 75.1 | 86.3 | 7.2%                  | 8.4% | 7.3%   | 2.2%  | 7.3% | 1.0%     | 1.4% | 1.2%   | 1.1% | 1.2% | 0.50                   | 0.43 | 0.42   | 0.46 | 0.42 |
| Item 2 |  | 64.7            | 61.3 | 71.5   | 59.3 | 71.5 | 9.0%                  | 7.7% | 9.1%   | 6.5%  | 9.1% | 1.4%     | 1.7% | 1.2%   | 1.1% | 1.2% | 0.53                   | 0.48 | 0.51   | 0.57 | 0.51 |
| Item 3 |  | 82.5            | 83.7 | 89.0   | 78.0 | 89.0 | 0.5%                  | 1.4% | 0.0%   | 1.1%  | 0.0% | 0.5%     | 0.7% | 0.6%   | 1.1% | 0.6% | 0.65                   | 0.56 | 0.58   | 0.66 | 0.58 |
| Item 4 |  | 76.1            | 75.6 | 85.2   | 68.9 | 85.2 | 6.7%                  | 5.6% | 5.3%   | 12.0% | 5.3% | 1.7%     | 1.4% | 2.1%   | 2.2% | 2.1% | 0.63                   | 0.53 | 0.52   | 0.74 | 0.52 |

Dimension „Patient safety“

|        |                                                                                                                          | mean |      |        |     |      | standard deviation |      |        |     |      |
|--------|--------------------------------------------------------------------------------------------------------------------------|------|------|--------|-----|------|--------------------|------|--------|-----|------|
| Item   |                                                                                                                          | All  | Card | Cancer | Mus | Ment | All                | Card | Cancer | Mus | Ment |
| Item 1 | I was encouraged to speak up if I noticed inconsistencies in my treatment.                                               | 4.1  | 4.1  | 4.3    | 3.7 | 4.3  | 1.7                | 1.7  | 1.8    | 1.8 | 1.8  |
| Item 2 | I was examined thoroughly and carefully.                                                                                 | 5.3  | 5.5  | 5.6    | 5.1 | 5.6  | 1.0                | 0.8  | 0.7    | 1.2 | 0.7  |
| Item 3 | When I was prescribed new medication, I was asked what other medication I am taking and whether I have any intolerances. | 5.2  | 5.2  | 5.4    | 5.0 | 5.4  | 1.3                | 1.2  | 1.1    | 1.5 | 1.1  |
| Item 4 | I was informed about whom to contact if there was an inconsistency in my treatment or if I wanted to file a complaint.   | 2.9  | 2.7  | 3.0    | 2.6 | 3.0  | 1.8                | 1.8  | 1.9    | 1.8 | 1.9  |

|        |  | item difficulty |      |        |      |      | 'does not concern me' |       |        |       |       | no reply |      |        |      |      | item total correlation |      |        |      |      |
|--------|--|-----------------|------|--------|------|------|-----------------------|-------|--------|-------|-------|----------|------|--------|------|------|------------------------|------|--------|------|------|
|        |  | All             | Card | Cancer | Mus  | Ment | All                   | Card  | Cancer | Mus   | Ment  | All      | Card | Cancer | Mus  | Ment | All                    | Card | Cancer | Mus  | Ment |
| Item 1 |  | 61.9            | 62.0 | 65.5   | 53.5 | 65.5 | 14.2%                 | 15.0% | 19.1%  | 8.7%  | 19.1% | 1.2%     | 1.0% | 1.5%   | 1.1% | 1.5% | 0.65                   | 0.63 | 0.65   | 0.66 | 0.65 |
| Item 2 |  | 86.9            | 90.8 | 92.8   | 83.0 | 92.8 | 1.0%                  | 0.3%  | 0.9%   | 1.1%  | 0.9%  | 2.3%     | 1.4% | 3.2%   | 4.3% | 3.2% | 0.47                   | 0.41 | 0.39   | 0.56 | 0.39 |
| Item 3 |  | 84.1            | 84.9 | 88.7   | 80.7 | 88.7 | 13.1%                 | 9.8%  | 15.0%  | 8.7%  | 15.0% | 1.1%     | 0.3% | 1.2%   | 2.2% | 1.2% | 0.50                   | 0.49 | 0.40   | 0.59 | 0.40 |
| Item 4 |  | 37.8            | 33.8 | 40.5   | 31.9 | 40.5 | 17.1%                 | 17.8% | 22.0%  | 13.0% | 22.0% | 1.3%     | 1.4% | 1.5%   | 1.1% | 1.5% | 0.49                   | 0.47 | 0.44   | 0.53 | 0.44 |

Dimension „Patient information”

| Item                                                                                                                                  | mean |      |        |     |      | standard deviation |      |        |     |      |
|---------------------------------------------------------------------------------------------------------------------------------------|------|------|--------|-----|------|--------------------|------|--------|-----|------|
|                                                                                                                                       | All  | Card | Cancer | Mus | Ment | All                | Card | Cancer | Mus | Ment |
| Item 1 I received information about my condition from my healthcare professionals (for example, causes, symptoms, effects or course). | 4.6  | 4.8  | 4.7    | 4.4 | 4.7  | 1.5                | 1.4  | 1.4    | 1.7 | 1.4  |
| Item 2 I was asked what I already know about my condition.                                                                            | 4.1  | 4.3  | 4.2    | 3.9 | 4.2  | 1.8                | 1.7  | 1.7    | 1.9 | 1.7  |
| Item 3 The significance of my test results was explained to me.                                                                       | 4.8  | 4.8  | 5.1    | 4.6 | 5.1  | 1.5                | 1.4  | 1.2    | 1.7 | 1.2  |
| Item 4 I was asked what I would like to know about my condition.                                                                      | 4.2  | 4.4  | 4.4    | 3.9 | 4.4  | 1.8                | 1.7  | 1.7    | 1.9 | 1.7  |

|        | item difficulty |      |        |      |      | 'does not concern me' |       |        |      |      | no reply |      |        |      |      | item total correlation |      |        |      |      |
|--------|-----------------|------|--------|------|------|-----------------------|-------|--------|------|------|----------|------|--------|------|------|------------------------|------|--------|------|------|
|        | All             | Card | Cancer | Mus  | Ment | All                   | Card  | Cancer | Mus  | Ment | All      | Card | Cancer | Mus  | Ment | All                    | Card | Cancer | Mus  | Ment |
| Item 1 | 72.1            | 76.6 | 73.7   | 68.1 | 73.7 | 6.4%                  | 5.2%  | 7.9%   | 5.4% | 7.9% | 1.3%     | 1.4% | 1.8%   | 1.1% | 1.8% | 0.72                   | 0.72 | 0.68   | 0.77 | 0.68 |
| Item 2 | 62.3            | 65.7 | 63.6   | 58.9 | 63.6 | 6.6%                  | 8.0%  | 7.0%   | 5.4% | 7.0% | 0.8%     | 1.7% | 0.6%   | 0.0% | 0.6% | 0.65                   | 0.66 | 0.63   | 0.67 | 0.63 |
| Item 3 | 75.1            | 76.9 | 82.9   | 71.0 | 82.9 | 4.6%                  | 2.1%  | 4.7%   | 3.3% | 4.7% | 1.2%     | 1.4% | 1.8%   | 0.0% | 1.8% | 0.63                   | 0.64 | 0.58   | 0.72 | 0.58 |
| Item 4 | 63.0            | 68.2 | 68.9   | 57.2 | 68.9 | 8.9%                  | 10.8% | 8.8%   | 6.5% | 8.8% | 1.4%     | 1.7% | 1.8%   | 0.0% | 1.8% | 0.68                   | 0.61 | 0.63   | 0.77 | 0.63 |

Dimension „Patient involvement in care”

|        |                                                                                                                    | mean |      |        |     |      | standard deviation |      |        |     |      |
|--------|--------------------------------------------------------------------------------------------------------------------|------|------|--------|-----|------|--------------------|------|--------|-----|------|
| Item   |                                                                                                                    | All  | Card | Cancer | Mus | Ment | All                | Card | Cancer | Mus | Ment |
| Item 1 | I was an equal partner with my healthcare professionals (for example, in making decisions or sharing information). | 4.8  | 4.8  | 5.2    | 4.4 | 5.2  | 1.3                | 1.3  | 1.0    | 1.5 | 1.0  |
| Item 2 | I was informed about various treatment options and their advantages and disadvantages.                             | 4.4  | 4.3  | 5.0    | 4.1 | 5.0  | 1.7                | 1.7  | 1.4    | 1.8 | 1.4  |
| Item 3 | I was able to participate in the decision-making process as much as I wanted to.                                   | 4.3  | 4.1  | 4.7    | 4.0 | 4.7  | 1.7                | 1.7  | 1.6    | 1.8 | 1.6  |
| Item 4 | When deciding about treatment, it was taken into account what is particularly important to me.                     | 4.3  | 4.0  | 4.7    | 4.1 | 4.7  | 1.6                | 1.8  | 1.5    | 1.7 | 1.5  |

|        |  | item difficulty |      |        |      |      | 'does not concern me' |       |        |       |       | no reply |      |        |      |      | item total correlation |      |        |      |      |
|--------|--|-----------------|------|--------|------|------|-----------------------|-------|--------|-------|-------|----------|------|--------|------|------|------------------------|------|--------|------|------|
|        |  | All             | Card | Cancer | Mus  | Ment | All                   | Card  | Cancer | Mus   | Ment  | All      | Card | Cancer | Mus  | Ment | All                    | Card | Cancer | Mus  | Ment |
| Item 1 |  | 75.8            | 75.1 | 83.6   | 68.5 | 83.6 | 4.4%                  | 7.3%  | 3.8%   | 2.2%  | 3.8%  | 1.8%     | 2.1% | 2.6%   | 1.1% | 2.6% | 0.66                   | 0.51 | 0.64   | 0.76 | 0.64 |
| Item 2 |  | 68.8            | 66.7 | 80.4   | 62.7 | 80.4 | 16.4%                 | 21.0% | 15.8%  | 10.9% | 15.8% | 0.8%     | 0.0% | 1.5%   | 1.1% | 1.5% | 0.70                   | 0.67 | 0.69   | 0.68 | 0.69 |
| Item 3 |  | 65.6            | 62.2 | 74.1   | 60.2 | 74.1 | 18.6%                 | 25.9% | 19.1%  | 7.6%  | 19.1% | 1.5%     | 0.7% | 2.9%   | 1.1% | 2.9% | 0.78                   | 0.74 | 0.82   | 0.80 | 0.82 |
| Item 4 |  | 66.9            | 60.0 | 74.3   | 62.6 | 74.3 | 18.5%                 | 26.6% | 21.7%  | 7.6%  | 21.7% | 1.7%     | 2.1% | 2.3%   | 1.1% | 2.3% | 0.76                   | 0.77 | 0.78   | 0.73 | 0.78 |

Dimension „Involvement of family and friends”

|        |                                                                                                                                                                                                     | mean |      |        |     |      | standard deviation |      |        |     |      |
|--------|-----------------------------------------------------------------------------------------------------------------------------------------------------------------------------------------------------|------|------|--------|-----|------|--------------------|------|--------|-----|------|
| Item   |                                                                                                                                                                                                     | All  | Card | Cancer | Mus | Ment | All                | Card | Cancer | Mus | Ment |
| Item 1 | I was informed about the options for involving my family members in the treatment (for example, accompanying to appointments, participating in conversations, or assisting with medication intake). | 3.3  | 3.3  | 3.4    | 2.7 | 3.4  | 1.9                | 2.0  | 1.9    | 1.8 | 1.9  |
| Item 2 | If I wanted to, my relatives were asked how much they wanted to be involved in my treatment.                                                                                                        | 3.1  | 3.3  | 3.2    | 2.8 | 3.2  | 1.9                | 2.0  | 1.9    | 1.9 | 1.9  |
| Item 3 | My relatives were given as much information about my condition and my treatment as I wanted to.                                                                                                     | 4.1  | 4.3  | 4.5    | 3.4 | 4.5  | 1.9                | 1.9  | 1.8    | 1.9 | 1.8  |
| Item 4 | My relatives were involved in my treatment as much as I wanted them to be.                                                                                                                          | 4.0  | 4.1  | 4.2    | 3.4 | 4.2  | 1.9                | 2.0  | 1.9    | 2.0 | 1.9  |

|        |  | item difficulty |      |        |      |      | 'does not concern me' |       |        |       |       | no reply |      |        |      |      | item total correlation |      |        |      |      |
|--------|--|-----------------|------|--------|------|------|-----------------------|-------|--------|-------|-------|----------|------|--------|------|------|------------------------|------|--------|------|------|
|        |  | All             | Card | Cancer | Mus  | Ment | All                   | Card  | Cancer | Mus   | Ment  | All      | Card | Cancer | Mus  | Ment | All                    | Card | Cancer | Mus  | Ment |
| Item 1 |  | 46.0            | 45.4 | 48.7   | 33.0 | 48.7 | 29.6%                 | 39.2% | 30.5%  | 28.3% | 30.5% | 1.0%     | 1.0% | 1.2%   | 0.0% | 1.2% | 0.75                   | 0.74 | 0.76   | 0.77 | 0.76 |
| Item 2 |  | 42.8            | 45.6 | 43.5   | 35.0 | 43.5 | 50.2%                 | 53.8% | 50.4%  | 43.5% | 50.4% | 1.4%     | 2.1% | 1.5%   | 0.0% | 1.5% | 0.82                   | 0.87 | 0.79   | 0.78 | 0.79 |
| Item 3 |  | 62.4            | 65.2 | 70.2   | 47.3 | 70.2 | 40.3%                 | 46.2% | 37.0%  | 40.2% | 37.0% | 1.4%     | 1.4% | 1.5%   | 0.0% | 1.5% | 0.80                   | 0.81 | 0.77   | 0.77 | 0.77 |
| Item 4 |  | 59.5            | 61.3 | 64.2   | 48.0 | 64.2 | 43.0%                 | 50.3% | 41.1%  | 40.2% | 41.1% | 1.9%     | 2.1% | 2.3%   | 0.0% | 2.3% | 0.85                   | 0.86 | 0.88   | 0.82 | 0.88 |

Dimension „Patient empowerment”

|        |                                                                                                                                   | mean |      |        |     |      | standard deviation |      |        |     |      |
|--------|-----------------------------------------------------------------------------------------------------------------------------------|------|------|--------|-----|------|--------------------|------|--------|-----|------|
| Item   |                                                                                                                                   | All  | Card | Cancer | Mus | Ment | All                | Card | Cancer | Mus | Ment |
| Item 1 | I was encouraged to improve my health by changing my behavior (for example, through diet, exercise, reducing tobacco or alcohol). | 4.0  | 3.8  | 3.8    | 3.6 | 3.8  | 1.7                | 1.8  | 1.8    | 1.7 | 1.8  |
| Item 2 | I was encouraged to ask questions.                                                                                                | 4.8  | 4.8  | 5.0    | 4.2 | 5.0  | 1.4                | 1.4  | 1.2    | 1.6 | 1.2  |
| Item 3 | I was explained where to find understandable and scientifically based information about my health.                                | 3.3  | 3.0  | 3.6    | 3.1 | 3.6  | 1.7                | 1.7  | 1.7    | 1.8 | 1.7  |
| Item 4 | If needed, realistic goals for my health were agreed upon (for example, going for a walk every day, eating fruits every day).     | 3.7  | 3.4  | 3.7    | 3.4 | 3.7  | 1.8                | 1.9  | 1.8    | 1.7 | 1.8  |

|        |  | item difficulty |      |        |      |      | 'does not concern me' |       |        |       |       | no reply |      |        |      |      | item total correlation |      |        |      |      |
|--------|--|-----------------|------|--------|------|------|-----------------------|-------|--------|-------|-------|----------|------|--------|------|------|------------------------|------|--------|------|------|
|        |  | All             | Card | Cancer | Mus  | Ment | All                   | Card  | Cancer | Mus   | Ment  | All      | Card | Cancer | Mus  | Ment | All                    | Card | Cancer | Mus  | Ment |
| Item 1 |  | 60.8            | 56.0 | 56.5   | 52.6 | 56.5 | 25.8%                 | 29.0% | 34.0%  | 20.7% | 34.0% | 0.5%     | 0.3% | 1.2%   | 0.0% | 1.2% | 0.67                   | 0.71 | 0.70   | 0.67 | 0.70 |
| Item 2 |  | 75.0            | 76.8 | 79.8   | 63.8 | 79.8 | 4.8%                  | 8.0%  | 4.7%   | 2.2%  | 4.7%  | 1.1%     | 0.7% | 1.8%   | 1.1% | 1.8% | 0.47                   | 0.43 | 0.50   | 0.47 | 0.50 |
| Item 3 |  | 46.3            | 40.8 | 51.5   | 42.4 | 51.5 | 16.6%                 | 24.5% | 15.5%  | 10.9% | 15.5% | 1.5%     | 1.4% | 2.1%   | 0.0% | 2.1% | 0.61                   | 0.58 | 0.66   | 0.60 | 0.66 |
| Item 4 |  | 54.7            | 48.6 | 53.8   | 48.8 | 53.8 | 29.1%                 | 34.6% | 34.9%  | 25.0% | 34.9% | 1.0%     | 0.7% | 1.8%   | 1.1% | 1.8% | 0.73                   | 0.73 | 0.76   | 0.66 | 0.76 |

Dimension „Physical support”

| Item                                                                                                                                      | mean |      |        |     |      | standard deviation |      |        |     |      |
|-------------------------------------------------------------------------------------------------------------------------------------------|------|------|--------|-----|------|--------------------|------|--------|-----|------|
|                                                                                                                                           | All  | Card | Cancer | Mus | Ment | All                | Card | Cancer | Mus | Ment |
| Item 1 When I had pain, I was helped quickly.                                                                                             | 5.4  | 5.6  | 5.7    | 4.9 | 5.7  | 1.0                | 0.8  | 0.7    | 1.3 | 0.7  |
| Item 2 If I had physical complaints, I was helped quickly (for example with nausea or restlessness).                                      | 5.2  | 5.4  | 5.6    | 4.8 | 5.6  | 1.1                | 0.9  | 0.8    | 1.3 | 0.8  |
| Item 3 I was examined and treated cautiously (for example when giving injections, changing dressings, or washing).                        | 5.5  | 5.5  | 5.7    | 5.0 | 5.7  | 0.9                | 0.9  | 0.6    | 1.3 | 0.6  |
| Item 4 If needed, I was asked whether I needed help with everyday tasks (for example, from a care service, home help, or walking frames). | 4.2  | 4.2  | 4.5    | 4.2 | 4.5  | 1.8                | 1.9  | 1.8    | 1.9 | 1.8  |

|        | item difficulty |      |        |      |      | 'does not concern me' |       |        |       |       | no reply |      |        |      |      | item total correlation |      |        |      |      |
|--------|-----------------|------|--------|------|------|-----------------------|-------|--------|-------|-------|----------|------|--------|------|------|------------------------|------|--------|------|------|
|        | All             | Card | Cancer | Mus  | Ment | All                   | Card  | Cancer | Mus   | Ment  | All      | Card | Cancer | Mus  | Ment | All                    | Card | Cancer | Mus  | Ment |
| Item 1 | 87.1            | 91.3 | 94.0   | 77.0 | 94.0 | 19.4%                 | 23.8% | 17.0%  | 5.4%  | 17.0% | 0.8%     | 1.4% | 0.6%   | 0.0% | 0.6% | 0.71                   | 0.70 | 0.54   | 0.67 | 0.54 |
| Item 2 | 84.9            | 88.4 | 92.2   | 76.3 | 92.2 | 23.8%                 | 28.3% | 23.8%  | 22.8% | 23.8% | 0.5%     | 0.7% | 0.6%   | 0.0% | 0.6% | 0.71                   | 0.60 | 0.56   | 0.74 | 0.56 |
| Item 3 | 89.1            | 89.5 | 94.2   | 80.7 | 94.2 | 5.8%                  | 2.1%  | 1.8%   | 12.0% | 1.8%  | 0.3%     | 0.0% | 0.6%   | 0.0% | 0.6% | 0.57                   | 0.47 | 0.46   | 0.51 | 0.46 |
| Item 4 | 64.4            | 63.2 | 70.5   | 64.3 | 70.5 | 48.2%                 | 51.7% | 48.7%  | 28.3% | 48.7% | 0.6%     | 0.3% | 0.6%   | 1.1% | 0.6% | 0.45                   | 0.44 | 0.21   | 0.64 | 0.21 |



Dimension „Emotional support”

|        |                                                                                                                                   | mean |      |        |     |      | standard deviation |      |        |     |      |
|--------|-----------------------------------------------------------------------------------------------------------------------------------|------|------|--------|-----|------|--------------------|------|--------|-----|------|
| Item   |                                                                                                                                   | All  | Card | Cancer | Mus | Ment | All                | Card | Cancer | Mus | Ment |
| Item 1 | The healthcare professionals addressed my fears and concerns (for example, by showing understanding and providing encouragement). | 4.4  | 4.1  | 4.7    | 3.6 | 4.7  | 1.6                | 1.7  | 1.4    | 1.8 | 1.4  |
| Item 2 | I had the opportunity to talk to my healthcare professionals about my feelings.                                                   | 4.3  | 3.8  | 4.5    | 3.2 | 4.5  | 1.7                | 1.8  | 1.6    | 1.7 | 1.6  |
| Item 3 | I was encouraged to talk about my feelings.                                                                                       | 3.7  | 3.1  | 3.5    | 2.6 | 3.5  | 1.8                | 1.7  | 1.8    | 1.7 | 1.8  |
| Item 4 | I was asked whether I would like psychological support (for example, psychological counselling, psychotherapy, or pastoral care). | 3.9  | 2.6  | 4.7    | 2.3 | 4.7  | 2.0                | 1.8  | 1.8    | 1.8 | 1.8  |

|        |  | item difficulty |      |        |      |      | 'does not concern me' |       |        |       |       | no reply |      |        |      |      | item total correlation |      |        |      |      |
|--------|--|-----------------|------|--------|------|------|-----------------------|-------|--------|-------|-------|----------|------|--------|------|------|------------------------|------|--------|------|------|
|        |  | All             | Card | Cancer | Mus  | Ment | All                   | Card  | Cancer | Mus   | Ment  | All      | Card | Cancer | Mus  | Ment | All                    | Card | Cancer | Mus  | Ment |
| Item 1 |  | 68.8            | 62.3 | 74.5   | 51.3 | 74.5 | 15.9%                 | 25.2% | 17.9%  | 14.1% | 17.9% | 1.5%     | 0.7% | 2.6%   | 1.1% | 2.6% | 0.76                   | 0.74 | 0.73   | 0.76 | 0.73 |
| Item 2 |  | 66.4            | 55.4 | 69.9   | 43.6 | 69.9 | 18.3%                 | 28.7% | 20.5%  | 18.5% | 20.5% | 1.4%     | 1.7% | 1.2%   | 2.2% | 1.2% | 0.84                   | 0.87 | 0.76   | 0.82 | 0.76 |
| Item 3 |  | 53.7            | 41.3 | 50.7   | 31.1 | 50.7 | 19.5%                 | 30.4% | 21.1%  | 20.7% | 21.1% | 1.7%     | 1.4% | 2.3%   | 1.1% | 2.3% | 0.79                   | 0.86 | 0.72   | 0.78 | 0.72 |
| Item 4 |  | 57.9            | 31.2 | 74.6   | 25.9 | 74.6 | 23.4%                 | 39.2% | 13.5%  | 25.0% | 13.5% | 1.0%     | 0.7% | 1.2%   | 1.1% | 1.2% | 0.63                   | 0.59 | 0.48   | 0.69 | 0.48 |
